# Supplementary material
Source: publisher site journal article supplement (http://bdj.pensoft.net//lib/ajax_srv/article_elements_srv.php?action=download_suppl_file&instance_id=750271)
Supplement: Supplementary file [file article_elements_srv.php]

Jun 1, 2010 - Jun 1, 2011

All Sessions  
100.00%

+ Add Segment

Explorer

Summary

| Language                   | Acquisition                                                            |                                                              |                                                                    | Behavior                                                     |                                                            |                                                                  | Conversions                                                |                                                      |                                                                |
|----------------------------|------------------------------------------------------------------------|--------------------------------------------------------------|--------------------------------------------------------------------|--------------------------------------------------------------|------------------------------------------------------------|------------------------------------------------------------------|------------------------------------------------------------|------------------------------------------------------|----------------------------------------------------------------|
|                            | Sessions                                                               | % New Sessions                                               | New Users                                                          | Bounce Rate                                                  | Pages / Session                                            | Avg. Session Duration                                            | Goal Conversion Rate                                       | Goal Completions                                     | Goal Value                                                     |
|                            | <b>1,083,185</b><br><small>% of Total: 100.00%<br/>(1,083,185)</small> | <b>22.64%</b><br><small>Site Avg: 22.59%<br/>(0.23%)</small> | <b>245,287</b><br><small>% of Total: 100.23%<br/>(244,712)</small> | <b>25.52%</b><br><small>Site Avg: 25.52%<br/>(0.00%)</small> | <b>14.65</b><br><small>Site Avg: 14.65<br/>(0.00%)</small> | <b>00:14:34</b><br><small>Site Avg: 00:14:34<br/>(0.00%)</small> | <b>0.00%</b><br><small>Site Avg: 0.00%<br/>(0.00%)</small> | <b>0</b><br><small>% of Total: 0.00%<br/>(0)</small> | <b>\$0.00</b><br><small>% of Total: 0.00%<br/>(\$0.00)</small> |
| 1. <a href="#">en-us</a>   | <b>374,890</b> (34.61%)                                                | 21.50%                                                       | 80,586 (32.85%)                                                    | 27.70%                                                       | 14.98                                                      | 00:14:06                                                         | 0.00%                                                      | 0 (0.00%)                                            | \$0.00 (0.00%)                                                 |
| 2. <a href="#">es</a>      | <b>194,385</b> (17.95%)                                                | 21.86%                                                       | 42,499 (17.33%)                                                    | 20.37%                                                       | 16.68                                                      | 00:16:45                                                         | 0.00%                                                      | 0 (0.00%)                                            | \$0.00 (0.00%)                                                 |
| 3. <a href="#">pt-br</a>   | <b>155,097</b> (14.32%)                                                | 25.50%                                                       | 39,542 (16.12%)                                                    | 21.25%                                                       | 12.48                                                      | 00:13:21                                                         | 0.00%                                                      | 0 (0.00%)                                            | \$0.00 (0.00%)                                                 |
| 4. <a href="#">es-es</a>   | <b>89,823</b> (8.29%)                                                  | 18.64%                                                       | 16,747 (6.83%)                                                     | 33.15%                                                       | 15.19                                                      | 00:14:48                                                         | 0.00%                                                      | 0 (0.00%)                                            | \$0.00 (0.00%)                                                 |
| 5. <a href="#">fr</a>      | <b>60,957</b> (5.63%)                                                  | 21.77%                                                       | 13,271 (5.41%)                                                     | 19.04%                                                       | 17.47                                                      | 00:18:59                                                         | 0.00%                                                      | 0 (0.00%)                                            | \$0.00 (0.00%)                                                 |
| 6. <a href="#">de</a>      | <b>38,713</b> (3.57%)                                                  | 29.05%                                                       | 11,246 (4.58%)                                                     | 27.24%                                                       | 11.49                                                      | 00:13:16                                                         | 0.00%                                                      | 0 (0.00%)                                            | \$0.00 (0.00%)                                                 |
| 7. <a href="#">en-gb</a>   | <b>22,770</b> (2.10%)                                                  | 16.86%                                                       | 3,838 (1.56%)                                                      | 25.03%                                                       | 12.09                                                      | 00:14:01                                                         | 0.00%                                                      | 0 (0.00%)                                            | \$0.00 (0.00%)                                                 |
| 8. <a href="#">zh-cn</a>   | <b>17,170</b> (1.59%)                                                  | 22.23%                                                       | 3,817 (1.56%)                                                      | 17.83%                                                       | 13.46                                                      | 00:14:20                                                         | 0.00%                                                      | 0 (0.00%)                                            | \$0.00 (0.00%)                                                 |
| 9. <a href="#">ru</a>      | <b>14,384</b> (1.33%)                                                  | 38.65%                                                       | 5,560 (2.27%)                                                      | 42.64%                                                       | 7.89                                                       | 00:08:10                                                         | 0.00%                                                      | 0 (0.00%)                                            | \$0.00 (0.00%)                                                 |
| 10. <a href="#">es-419</a> | <b>11,645</b> (1.08%)                                                  | 25.50%                                                       | 2,969 (1.21%)                                                      | 18.23%                                                       | 18.16                                                      | 00:16:34                                                         | 0.00%                                                      | 0 (0.00%)                                            | \$0.00 (0.00%)                                                 |
| 11. <a href="#">en</a>     | <b>10,372</b> (0.96%)                                                  | 20.65%                                                       | 2,142 (0.87%)                                                      | 45.78%                                                       | 9.59                                                       | 00:09:55                                                         | 0.00%                                                      | 0 (0.00%)                                            | \$0.00 (0.00%)                                                 |
| 12. <a href="#">zh-tw</a>  | <b>9,893</b> (0.91%)                                                   | 16.79%                                                       | 1,661 (0.68%)                                                      | 29.97%                                                       | 7.83                                                       | 00:11:13                                                         | 0.00%                                                      | 0 (0.00%)                                            | \$0.00 (0.00%)                                                 |
| 13. <a href="#">it</a>     | <b>8,564</b> (0.79%)                                                   | 28.69%                                                       | 2,457 (1.00%)                                                      | 21.45%                                                       | 19.33                                                      | 00:16:31                                                         | 0.00%                                                      | 0 (0.00%)                                            | \$0.00 (0.00%)                                                 |
| 14. <a href="#">es-ar</a>  | <b>8,553</b> (0.79%)                                                   | 23.00%                                                       | 1,967 (0.80%)                                                      | 23.13%                                                       | 14.51                                                      | 00:15:52                                                         | 0.00%                                                      | 0 (0.00%)                                            | \$0.00 (0.00%)                                                 |
| 15. <a href="#">ko</a>     | <b>6,798</b> (0.63%)                                                   | 20.02%                                                       | 1,361 (0.55%)                                                      | 17.11%                                                       | 13.06                                                      | 00:14:44                                                         | 0.00%                                                      | 0 (0.00%)                                            | \$0.00 (0.00%)                                                 |
| 16. <a href="#">ja</a>     | <b>6,628</b> (0.61%)                                                   | 22.33%                                                       | 1,480 (0.60%)                                                      | 23.30%                                                       | 12.31                                                      | 00:08:28                                                         | 0.00%                                                      | 0 (0.00%)                                            | \$0.00 (0.00%)                                                 |
| 17. <a href="#">pl</a>     | <b>5,598</b> (0.52%)                                                   | 27.55%                                                       | 1,542 (0.63%)                                                      | 34.71%                                                       | 9.36                                                       | 00:09:41                                                         | 0.00%                                                      | 0 (0.00%)                                            | \$0.00 (0.00%)                                                 |
| 18. <a href="#">es-mx</a>  | <b>5,456</b> (0.50%)                                                   | 17.82%                                                       | 972 (0.40%)                                                        | 18.91%                                                       | 17.85                                                      | 00:17:43                                                         | 0.00%                                                      | 0 (0.00%)                                            | \$0.00 (0.00%)                                                 |
| 19. <a href="#">nl</a>     | <b>5,440</b> (0.50%)                                                   | 32.24%                                                       | 1,754 (0.72%)                                                      | 27.50%                                                       | 20.96                                                      | 00:12:51                                                         | 0.00%                                                      | 0 (0.00%)                                            | \$0.00 (0.00%)                                                 |
| 20. <a href="#">fr-fr</a>  | <b>4,768</b> (0.44%)                                                   | 9.92%                                                        | 473 (0.19%)                                                        | 49.77%                                                       | 11.04                                                      | 00:09:31                                                         | 0.00%                                                      | 0 (0.00%)                                            | \$0.00 (0.00%)                                                 |
| 21. <a href="#">de-de</a>  | <b>3,189</b> (0.29%)                                                   | 24.62%                                                       | 785 (0.32%)                                                        | 43.99%                                                       | 7.25                                                       | 00:06:46                                                         | 0.00%                                                      | 0 (0.00%)                                            | \$0.00 (0.00%)                                                 |
| 22. <a href="#">cs</a>     | <b>3,118</b> (0.29%)                                                   | 34.45%                                                       | 1,074 (0.44%)                                                      | 29.44%                                                       | 13.04                                                      | 00:10:46                                                         | 0.00%                                                      | 0 (0.00%)                                            | \$0.00 (0.00%)                                                 |
| 23. <a href="#">sv-se</a>  | <b>2,744</b> (0.25%)                                                   | 12.50%                                                       | 343 (0.14%)                                                        | 21.76%                                                       | 9.21                                                       | 00:13:39                                                         | 0.00%                                                      | 0 (0.00%)                                            | \$0.00 (0.00%)                                                 |
| 24. <a href="#">sv</a>     | <b>2,512</b> (0.23%)                                                   | 18.79%                                                       | 472 (0.19%)                                                        | 16.68%                                                       | 15.04                                                      | 00:16:02                                                         | 0.00%                                                      | 0 (0.00%)                                            | \$0.00 (0.00%)                                                 |
| 25. <a href="#">pt-pt</a>  | <b>2,302</b> (0.21%)                                                   | 30.58%                                                       | 704 (0.29%)                                                        | 33.80%                                                       | 10.34                                                      | 00:10:04                                                         | 0.00%                                                      | 0 (0.00%)                                            | \$0.00 (0.00%)                                                 |
| 26. <a href="#">tr</a>     | <b>1,325</b> (0.12%)                                                   | 44.68%                                                       | 592 (0.24%)                                                        | 28.38%                                                       | 11.73                                                      | 00:11:45                                                         | 0.00%                                                      | 0 (0.00%)                                            | \$0.00 (0.00%)                                                 |

| Rank | Language  | Users         | Percentage | Count       | Percentage | Score | Time     | Engagement | Revenue        |
|------|-----------|---------------|------------|-------------|------------|-------|----------|------------|----------------|
| 27.  | pt        | 1,305 (0.12%) | 45.52%     | 594 (0.24%) | 32.26%     | 9.75  | 00:09:39 | 0.00%      | \$0.00 (0.00%) |
| 28.  | ja-jp     | 1,130 (0.10%) | 14.25%     | 161 (0.07%) | 44.51%     | 6.35  | 00:05:27 | 0.00%      | \$0.00 (0.00%) |
| 29.  | es-xl     | 1,097 (0.10%) | 0.64%      | 7 (0.00%)   | 54.51%     | 6.64  | 00:06:09 | 0.00%      | \$0.00 (0.00%) |
| 30.  | es-la     | 1,080 (0.10%) | 12.13%     | 131 (0.05%) | 45.93%     | 12.76 | 00:12:48 | 0.00%      | \$0.00 (0.00%) |
| 31.  | da        | 979 (0.09%)   | 32.07%     | 314 (0.13%) | 24.21%     | 11.03 | 00:08:59 | 0.00%      | \$0.00 (0.00%) |
| 32.  | fr-ca     | 979 (0.09%)   | 0.10%      | 1 (0.00%)   | 3.88%      | 68.45 | 00:56:15 | 0.00%      | \$0.00 (0.00%) |
| 33.  | ja-jp-mac | 873 (0.08%)   | 20.73%     | 181 (0.07%) | 19.47%     | 30.70 | 00:15:18 | 0.00%      | \$0.00 (0.00%) |
| 34.  | sk        | 813 (0.08%)   | 29.64%     | 241 (0.10%) | 33.09%     | 20.95 | 00:21:00 | 0.00%      | \$0.00 (0.00%) |
| 35.  | th        | 800 (0.07%)   | 21.75%     | 174 (0.07%) | 23.88%     | 10.09 | 00:12:36 | 0.00%      | \$0.00 (0.00%) |
| 36.  | el        | 622 (0.06%)   | 51.61%     | 321 (0.13%) | 35.85%     | 7.25  | 00:06:32 | 0.00%      | \$0.00 (0.00%) |
| 37.  | ca        | 621 (0.06%)   | 33.98%     | 211 (0.09%) | 21.10%     | 10.60 | 00:10:21 | 0.00%      | \$0.00 (0.00%) |
| 38.  | hu        | 579 (0.05%)   | 81.17%     | 470 (0.19%) | 57.34%     | 4.67  | 00:02:29 | 0.00%      | \$0.00 (0.00%) |
| 39.  | es-cl     | 541 (0.05%)   | 39.37%     | 213 (0.09%) | 17.01%     | 10.43 | 00:13:28 | 0.00%      | \$0.00 (0.00%) |
| 40.  | fi        | 445 (0.04%)   | 51.24%     | 228 (0.09%) | 31.46%     | 8.92  | 00:05:44 | 0.00%      | \$0.00 (0.00%) |
| 41.  | et        | 358 (0.03%)   | 36.31%     | 130 (0.05%) | 30.45%     | 5.33  | 00:05:13 | 0.00%      | \$0.00 (0.00%) |
| 42.  | vi        | 334 (0.03%)   | 41.32%     | 138 (0.06%) | 32.04%     | 8.44  | 00:10:49 | 0.00%      | \$0.00 (0.00%) |
| 43.  | no        | 324 (0.03%)   | 36.73%     | 119 (0.05%) | 23.46%     | 28.60 | 00:19:05 | 0.00%      | \$0.00 (0.00%) |
| 44.  | id        | 269 (0.02%)   | 80.67%     | 217 (0.09%) | 48.70%     | 4.03  | 00:06:32 | 0.00%      | \$0.00 (0.00%) |
| 45.  | nl-nl     | 265 (0.02%)   | 21.13%     | 56 (0.02%)  | 45.28%     | 7.39  | 00:06:15 | 0.00%      | \$0.00 (0.00%) |
| 46.  | it-it     | 249 (0.02%)   | 42.17%     | 105 (0.04%) | 39.36%     | 5.85  | 00:04:49 | 0.00%      | \$0.00 (0.00%) |
| 47.  | nb-no     | 202 (0.02%)   | 25.25%     | 51 (0.02%)  | 28.71%     | 57.02 | 00:21:59 | 0.00%      | \$0.00 (0.00%) |
| 48.  | de-at     | 197 (0.02%)   | 80.71%     | 159 (0.06%) | 6.09%      | 16.96 | 00:49:08 | 0.00%      | \$0.00 (0.00%) |
| 49.  | lv        | 172 (0.02%)   | 35.47%     | 61 (0.02%)  | 18.60%     | 28.39 | 00:19:29 | 0.00%      | \$0.00 (0.00%) |
| 50.  | zh-hk     | 161 (0.01%)   | 40.37%     | 65 (0.03%)  | 46.58%     | 9.81  | 00:05:47 | 0.00%      | \$0.00 (0.00%) |
| 51.  | ro        | 155 (0.01%)   | 71.61%     | 111 (0.05%) | 59.35%     | 4.34  | 00:02:47 | 0.00%      | \$0.00 (0.00%) |
| 52.  | lt        | 143 (0.01%)   | 50.35%     | 72 (0.03%)  | 44.06%     | 18.14 | 00:11:17 | 0.00%      | \$0.00 (0.00%) |
| 53.  | uk        | 141 (0.01%)   | 56.74%     | 80 (0.03%)  | 39.01%     | 15.46 | 00:09:01 | 0.00%      | \$0.00 (0.00%) |
| 54.  | bg        | 137 (0.01%)   | 66.42%     | 91 (0.04%)  | 54.74%     | 3.88  | 00:01:32 | 0.00%      | \$0.00 (0.00%) |
| 55.  | nb        | 122 (0.01%)   | 14.75%     | 18 (0.01%)  | 36.07%     | 37.66 | 00:16:13 | 0.00%      | \$0.00 (0.00%) |
| 56.  | sl        | 116 (0.01%)   | 76.72%     | 89 (0.04%)  | 61.21%     | 2.91  | 00:01:00 | 0.00%      | \$0.00 (0.00%) |
| 57.  | he        | 86 (0.01%)    | 89.53%     | 77 (0.03%)  | 54.65%     | 4.03  | 00:01:57 | 0.00%      | \$0.00 (0.00%) |
| 58.  | ru-ru     | 76 (0.01%)    | 67.11%     | 51 (0.02%)  | 61.84%     | 2.29  | 00:01:00 | 0.00%      | \$0.00 (0.00%) |
| 59.  | ar-sa     | 68 (0.01%)    | 88.24%     | 60 (0.02%)  | 54.41%     | 6.78  | 00:05:48 | 0.00%      | \$0.00 (0.00%) |
| 60.  | hr        | 63 (0.01%)    | 85.71%     | 54 (0.02%)  | 55.56%     | 5.92  | 00:04:03 | 0.00%      | \$0.00 (0.00%) |
| 61.  | ar        | 61 (0.01%)    | 81.97%     | 50 (0.02%)  | 50.82%     | 3.56  | 00:03:29 | 0.00%      | \$0.00 (0.00%) |
| 62.  | pl-pl     | 52 (0.00%)    | 78.85%     | 41 (0.02%)  | 65.38%     | 2.52  | 00:00:51 | 0.00%      | \$0.00 (0.00%) |
| 63.  | sr        | 49 (0.00%)    | 65.31%     | 32 (0.01%)  | 57.14%     | 3.04  | 00:01:38 | 0.00%      | \$0.00 (0.00%) |
| 64.  | da-dk     | 42 (0.00%)    | 66.67%     | 28 (0.01%)  | 42.86%     | 11.45 | 00:05:28 | 0.00%      | \$0.00 (0.00%) |
| 65.  | ko-kr     | 42 (0.00%)    | 26.19%     | 11 (0.00%)  | 45.24%     | 3.88  | 00:03:47 | 0.00%      | \$0.00 (0.00%) |
| 66.  | th-th     | 37 (0.00%)    | 8.11%      | 3 (0.00%)   | 70.27%     | 2.32  | 00:01:55 | 0.00%      | \$0.00 (0.00%) |

|      |                                   |                   |         |            |         |        |          |       |           |                |
|------|-----------------------------------|-------------------|---------|------------|---------|--------|----------|-------|-----------|----------------|
| 67.  | <a href="#">fil</a>               | <b>28</b> (0.00%) | 64.29%  | 18 (0.01%) | 32.14%  | 4.00   | 00:05:06 | 0.00% | 0 (0.00%) | \$0.00 (0.00%) |
| 68.  | <a href="#">c</a>                 | <b>26</b> (0.00%) | 84.62%  | 22 (0.01%) | 96.15%  | 1.12   | 00:00:07 | 0.00% | 0 (0.00%) | \$0.00 (0.00%) |
| 69.  | <a href="#">cs-cz</a>             | <b>20</b> (0.00%) | 65.00%  | 13 (0.01%) | 35.00%  | 5.30   | 00:03:54 | 0.00% | 0 (0.00%) | \$0.00 (0.00%) |
| 70.  | <a href="#">hu-hu</a>             | <b>19</b> (0.00%) | 63.16%  | 12 (0.00%) | 63.16%  | 2.42   | 00:00:35 | 0.00% | 0 (0.00%) | \$0.00 (0.00%) |
| 71.  | <a href="#">el-gr</a>             | <b>17</b> (0.00%) | 58.82%  | 10 (0.00%) | 52.94%  | 3.53   | 00:01:52 | 0.00% | 0 (0.00%) | \$0.00 (0.00%) |
| 72.  | <a href="#">(not set)</a>         | <b>16</b> (0.00%) | 87.50%  | 14 (0.01%) | 50.00%  | 3.62   | 00:04:54 | 0.00% | 0 (0.00%) | \$0.00 (0.00%) |
| 73.  | <a href="#">fi-fi</a>             | <b>15</b> (0.00%) | 80.00%  | 12 (0.00%) | 60.00%  | 2.53   | 00:01:03 | 0.00% | 0 (0.00%) | \$0.00 (0.00%) |
| 74.  | <a href="#">en_us</a>             | <b>14</b> (0.00%) | 92.86%  | 13 (0.01%) | 57.14%  | 4.00   | 00:03:36 | 0.00% | 0 (0.00%) | \$0.00 (0.00%) |
| 75.  | <a href="#">en-au</a>             | <b>14</b> (0.00%) | 35.71%  | 5 (0.00%)  | 14.29%  | 8.07   | 00:05:02 | 0.00% | 0 (0.00%) | \$0.00 (0.00%) |
| 76.  | <a href="#">ca-es</a>             | <b>13</b> (0.00%) | 46.15%  | 6 (0.00%)  | 53.85%  | 3.62   | 00:00:57 | 0.00% | 0 (0.00%) | \$0.00 (0.00%) |
| 77.  | <a href="#">pt-br; alexa</a>      | <b>11</b> (0.00%) | 81.82%  | 9 (0.00%)  | 45.45%  | 6.00   | 00:02:52 | 0.00% | 0 (0.00%) | \$0.00 (0.00%) |
| 78.  | <a href="#">fa</a>                | <b>10</b> (0.00%) | 60.00%  | 6 (0.00%)  | 50.00%  | 5.80   | 00:03:31 | 0.00% | 0 (0.00%) | \$0.00 (0.00%) |
| 79.  | <a href="#">en-ca</a>             | <b>9</b> (0.00%)  | 88.89%  | 8 (0.00%)  | 44.44%  | 3.22   | 00:01:02 | 0.00% | 0 (0.00%) | \$0.00 (0.00%) |
| 80.  | <a href="#">ms</a>                | <b>9</b> (0.00%)  | 0.00%   | 0 (0.00%)  | 33.33%  | 6.67   | 00:07:02 | 0.00% | 0 (0.00%) | \$0.00 (0.00%) |
| 81.  | <a href="#">lv-lv</a>             | <b>7</b> (0.00%)  | 57.14%  | 4 (0.00%)  | 42.86%  | 4.14   | 00:04:50 | 0.00% | 0 (0.00%) | \$0.00 (0.00%) |
| 82.  | <a href="#">eu</a>                | <b>6</b> (0.00%)  | 100.00% | 6 (0.00%)  | 50.00%  | 4.17   | 00:04:58 | 0.00% | 0 (0.00%) | \$0.00 (0.00%) |
| 83.  | <a href="#">gl</a>                | <b>5</b> (0.00%)  | 80.00%  | 4 (0.00%)  | 0.00%   | 4.00   | 00:03:01 | 0.00% | 0 (0.00%) | \$0.00 (0.00%) |
| 84.  | <a href="#">mn</a>                | <b>5</b> (0.00%)  | 60.00%  | 3 (0.00%)  | 100.00% | 1.00   | 00:00:00 | 0.00% | 0 (0.00%) | \$0.00 (0.00%) |
| 85.  | <a href="#">af-za</a>             | <b>4</b> (0.00%)  | 75.00%  | 3 (0.00%)  | 25.00%  | 20.25  | 00:21:14 | 0.00% | 0 (0.00%) | \$0.00 (0.00%) |
| 86.  | <a href="#">be</a>                | <b>4</b> (0.00%)  | 50.00%  | 2 (0.00%)  | 50.00%  | 208.00 | 01:11:04 | 0.00% | 0 (0.00%) | \$0.00 (0.00%) |
| 87.  | <a href="#">en-in</a>             | <b>4</b> (0.00%)  | 100.00% | 4 (0.00%)  | 75.00%  | 4.50   | 00:04:22 | 0.00% | 0 (0.00%) | \$0.00 (0.00%) |
| 88.  | <a href="#">en-za</a>             | <b>4</b> (0.00%)  | 75.00%  | 3 (0.00%)  | 50.00%  | 33.50  | 00:10:20 | 0.00% | 0 (0.00%) | \$0.00 (0.00%) |
| 89.  | <a href="#">is</a>                | <b>4</b> (0.00%)  | 75.00%  | 3 (0.00%)  | 50.00%  | 3.75   | 00:01:52 | 0.00% | 0 (0.00%) | \$0.00 (0.00%) |
| 90.  | <a href="#">mk</a>                | <b>4</b> (0.00%)  | 100.00% | 4 (0.00%)  | 75.00%  | 2.00   | 00:00:29 | 0.00% | 0 (0.00%) | \$0.00 (0.00%) |
| 91.  | <a href="#">tr-tr</a>             | <b>4</b> (0.00%)  | 75.00%  | 3 (0.00%)  | 75.00%  | 1.25   | 00:00:05 | 0.00% | 0 (0.00%) | \$0.00 (0.00%) |
| 92.  | <a href="#">de-ch</a>             | <b>3</b> (0.00%)  | 100.00% | 3 (0.00%)  | 33.33%  | 2.00   | 00:00:05 | 0.00% | 0 (0.00%) | \$0.00 (0.00%) |
| 93.  | <a href="#">cy</a>                | <b>2</b> (0.00%)  | 50.00%  | 1 (0.00%)  | 50.00%  | 3.50   | 00:00:21 | 0.00% | 0 (0.00%) | \$0.00 (0.00%) |
| 94.  | <a href="#">en-br; megaupload</a> | <b>2</b> (0.00%)  | 100.00% | 2 (0.00%)  | 0.00%   | 7.50   | 00:03:07 | 0.00% | 0 (0.00%) | \$0.00 (0.00%) |
| 95.  | <a href="#">et-ee</a>             | <b>2</b> (0.00%)  | 100.00% | 2 (0.00%)  | 0.00%   | 2.50   | 00:00:20 | 0.00% | 0 (0.00%) | \$0.00 (0.00%) |
| 96.  | <a href="#">hi</a>                | <b>2</b> (0.00%)  | 100.00% | 2 (0.00%)  | 100.00% | 1.00   | 00:00:00 | 0.00% | 0 (0.00%) | \$0.00 (0.00%) |
| 97.  | <a href="#">ru; alexa toolbar</a> | <b>2</b> (0.00%)  | 0.00%   | 0 (0.00%)  | 50.00%  | 1.50   | 00:00:12 | 0.00% | 0 (0.00%) | \$0.00 (0.00%) |
| 98.  | <a href="#">ast</a>               | <b>1</b> (0.00%)  | 100.00% | 1 (0.00%)  | 0.00%   | 5.00   | 00:00:36 | 0.00% | 0 (0.00%) | \$0.00 (0.00%) |
| 99.  | <a href="#">bg-bg</a>             | <b>1</b> (0.00%)  | 100.00% | 1 (0.00%)  | 100.00% | 1.00   | 00:00:00 | 0.00% | 0 (0.00%) | \$0.00 (0.00%) |
| 100. | <a href="#">bn</a>                | <b>1</b> (0.00%)  | 100.00% | 1 (0.00%)  | 0.00%   | 5.00   | 00:02:38 | 0.00% | 0 (0.00%) | \$0.00 (0.00%) |
